# Supplementary material for: Regulation effects of rosemary (Rosmarinus officinalisLinn.) on hepatic lipid metabolism in OA induced NAFLD rats
Source: Royal Society of Chemistry journal article supplement (doi:10.1039/c9fo01677e), 2019-01-01
Supplement: c9fo01677e1.pdf [file c9fo01677e1.pdf]

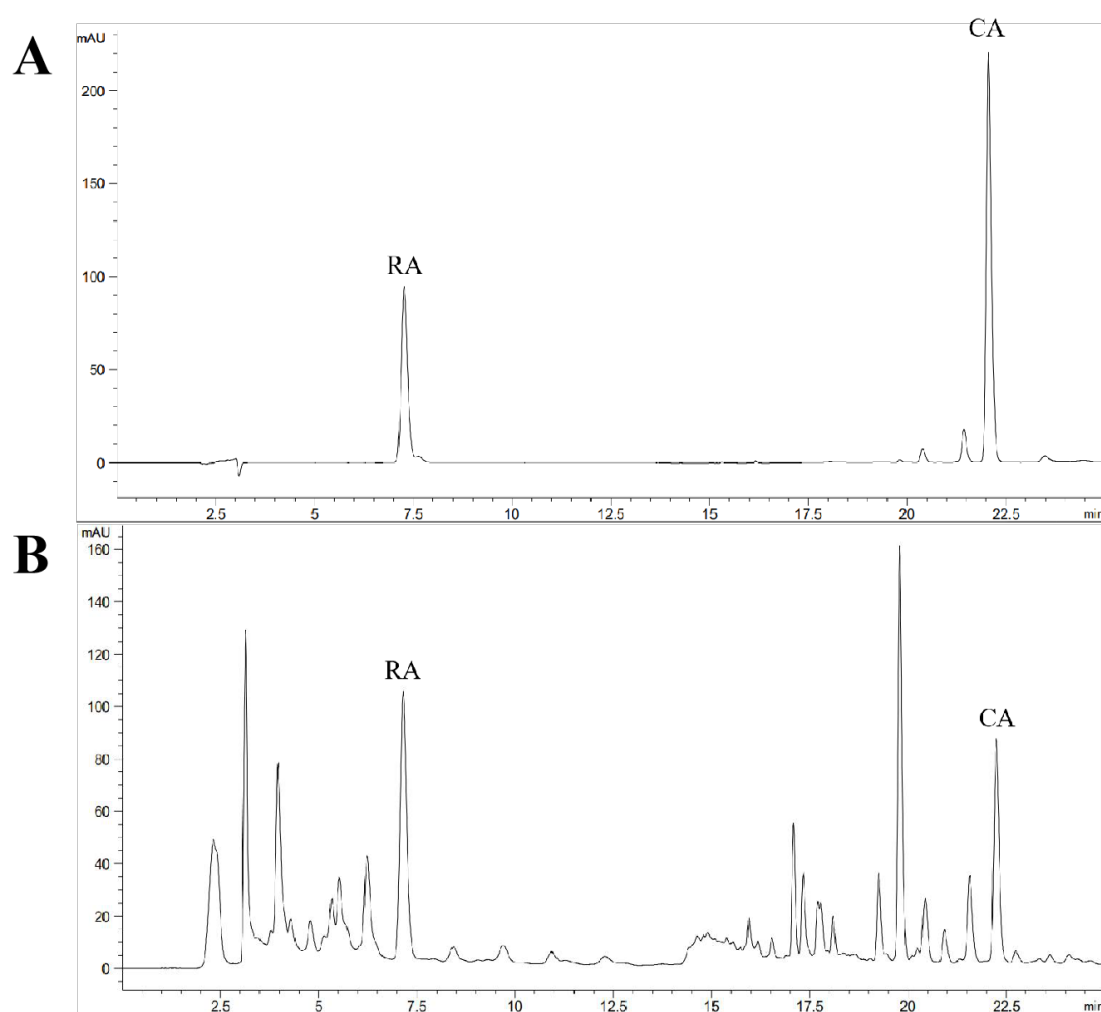

**Supplementary Figure.1**

Supplementary Figure.1 HPLC result of mixed control (rosmarinic acid and carnosic acid) (A) and content analysis of rosemary ethanol extract analysis (B). RA: rosmarinic acid, CA: carnosic acid.

HPLC condition: Agilent 1260 Infinity II system (Agilent Technology, Santa Clara, CA) with Eclipse Plus C18 column (Agilent Technologies, USA, 4.6×250 mm, 5  $\mu$ m), the mobile phases ( acetonitrile (A) -0.1% phosphoric acid (B) ) were utilized in a gradient mode (0-10 min: 25%A, 75%B; 10-15 min: 25% ~ 75%A; 15-25 min 75%A, 25%B) and the injector were maintained at 30 °C respectively. Injection volume was 10  $\mu$ l. UV spectra: 284 nm.
